# Supplementary material for: Detecting Risk of Low Health Literacy in Disadvantaged Populations Using Area-based Measures
Source: PubMed Central journal article supplement (PMC5994951; doi:10.5334/egems.191), 2017-12-15
Supplement: egems-5-3-191-s1.pdf [file egems-5-3-191-s1.pdf]

## Appendix 1. Selected Health Tasks by Health Literacy Score<sup>21</sup>

| Health Literacy Score  | Percent of Population | Activity                                                                                                                                                                                                                                                                                                                                                                                                                                                                                                                        |
|------------------------|-----------------------|---------------------------------------------------------------------------------------------------------------------------------------------------------------------------------------------------------------------------------------------------------------------------------------------------------------------------------------------------------------------------------------------------------------------------------------------------------------------------------------------------------------------------------|
| Proficient (310-500)   | 12%                   | <ul style="list-style-type: none"> <li>• Calculating one's personal share of employer health costs using a table</li> <li>• Finding definitions for complex medical terms</li> <li>• Interpreting legal documents and applying to specific health care situations</li> </ul>                                                                                                                                                                                                                                                    |
| Intermediate (226-309) | 53%                   | <ul style="list-style-type: none"> <li>• Determining a health weight range for one's height based on a body mass index</li> <li>• Finding the age range for certain childhood vaccines using a recommendation chart</li> <li>• Determining the times at which one can take a medication based on instructions on the prescription label</li> <li>• Identifying three substances that may interact negatively with an over-the-counter drug to produce side effects, based on the information provided on the package</li> </ul> |
| Basic (185-225)        | 22%                   | <ul style="list-style-type: none"> <li>• Interpreting a clearly-written pamphlet to determine two reasons a person should be testing for a disease even without symptoms</li> <li>• Explaining how a chronic disease may be asymptomatic based on a one-page article about the medical condition</li> </ul>                                                                                                                                                                                                                     |
| Below Basic (0-184)    | 14%                   | <ul style="list-style-type: none"> <li>• Interpreting a clearly-written pamphlet to determine how often one should have a certain medical test</li> <li>• Identifying what one can and cannot drink before a medical test based on a short set of instructions</li> <li>• Circle the date of a medical appointment on an appointment slip</li> </ul>                                                                                                                                                                            |
